# Supplementary material
Source: publisher site journal article supplement (http://static.cambridge.org/content/id/urn:cambridge.org:id:article:S1047951120000438/resource/name/S1047951120000438supp002.docx)
Supplement: Supplementary file 1 [file S1047951120000438supp002.docx]

**S1. Online Supplement 1: Pediatric Heart Network Investigators**

**National Heart, Lung, and Blood Institute:** Jonathan Kaltman, Victoria Pemberton, Kristin Burns, Mario Stylianou, Gail Pearson.

**Network Chair:** Lynn Mahony, University of Texas Southwestern Medical Center

**Data Coordinating Center:** New England Research Institutes, Watertown, MA: David Pober*, Shan Chen*, Felicia Trachtenberg, Suzanne Granger*, Pau Stark*, Steven Colan*, Dianne Gallagher*, Julia Keosaian*, Janet Ortiz*, Katelyn Nelson*, Tammi Mansolf*, Michelle Pucillo*, Eric Gerstenberger*, Susanne Langley*, Andrew Morrison*, Christiana Toomey*, Barbara Winrich*, Stephanie Moine*.

**Core Clinical Site Investigators:** Hospital for Sick Children, Toronto, CA: Steven Schwartz (PI), Fraser Golding, Brian McCrindle, Andreea Dragulescu, Elizabeth Radojewski*, Seema Mital, Patricia Walter, Cameron Slorach; Boston Children’s Hospital, Boston, MA: Jane Newburger (PI), John Triedman (PI), Ashwin Prakash, Jami Levine; Children's Hospital of Philadelphia, Philadelphia, PA: Stephen Paridon (PI), Meryl Cohen, David Goldberg, Tonia Morrison; Medical University of South Carolina, Charleston, SC: Andrew M. Atz (PI), Eric Graham (PI), Carolyn Taylor, Shahryar Chowdhury, Patricia Infinger; Primary Children’s Hospital and the University of Utah, Salt Lake City, Utah: L. LuAnn Minich (PI), Richard V. Williams (PI), Dongngan T. Truong, Linda M. Lambert, Marian E. Shearrow, Belva Stanton; University of Michigan Health System, Ann Arbor, MI: Caren Goldberg (PI), Richard Ohye (PI), Mary E. van der Velde, Suzanne Welch*; Cincinnati Children's Hospital and Medical Center, Cincinnati, OH: James F. Cnota (PI), Michelle Hamstra, Kathleen Ash, Joshua Sticka; Riley Hospital for Children, Indianapolis, IN: Mark Payne (PI), Timothy Cordes, Liz Swan; Children’s Healthcare of Atlanta, Atlanta, GA: William Mahle (PI), Heather S. Friedman, Laurie J. Clark, Ritu Sachdeva; Texas Children’s Hospital, Houston, TX: Daniel Penny (PI), Ricardo Pignatelli, David Garuba, Carolynn Altman.

**Auxiliary Site Investigators:** Columbia University Medical Center, New York, NY: Marc Richmond (PI), Wyman Lai*, Rosalind Korsin, Brett Anderson; University of Texas Southwestern Medical Center, Dallas, TX: Poonam Punjwani Thankavel (PI), Hollie Carron; Children’s Hospital of Wisconsin, Milwaukee, WI: Salil Ginde (PI), Michelle Otto, Michele Frommelt; Monroe Carrell Jr Children’s Hospital at Vanderbilt University, Nashville, TN: Larry Markham (PI), David A Parra, Jonathan H Soslow; Ann & Robert H. Lurie Children’s Hospital of Chicago, Chicago, IL: Luciana Young (PI) *, Joseph Camarda (PI), Elise Duffy, Kathleen Van’t Hof; Seattle Children’s Hospital, Seattle, WA: Mark Lewin (PI), Joel Lester, Aarti H Bhat, Amy Payne; Mount Sinai Hospital, New York, NY: Bruce Gelb (PI), Shubhika Srivastava; Montefiore Medical Center, Bronx, NY: Joseph Mahgerefteh (PI), Leo Lopez*, Kelly Ann Balem; Children’s National Health System, Washington, DC: Craig Sable (PI), Christopher Spurney;

**Echocardiography Core Laboratory:** Medical College of Wisconsin: Peter Frommelt (Director), Jessica Stelter, Hannah Hartsig.

**Protocol Review Committee:** Michael Artman, Chair; Anu Rao, Executive Secretary; Ben Eidem, G. Paul Matherne, Timothy Feltes, Julie Johnson, Jeffrey P. Krischer, Patrick McBride.

**Data and Safety Monitoring Board:** John Kugler, Chair; Frank Evans, Executive Secretary; David Driscoll, Mark Galantowicz, Sally Hunsberger, Thomas Knight, Holly Taylor.

*** No longer at the institution listed**
